# Supplementary material
Source: MDPI journal article supplement (https://www.mdpi.com/2077-0472/14/2/253)
Supplement: s1 [file s1]

## Supplementary Material

**Table S1:** Content and composition of the volatile phase ( $\mu\text{g}$  IS equivalents/g sample) in *R. pendulina* and its derived cultivars. Results are expressed as compound concentration per 3-nonanone standard.

|                                      | Rt     | Cas ID      | <i>R. pendulina</i>                   | 'Bourgogne'                          | 'Harstad'                             | 'Mount Everest'                      |
|--------------------------------------|--------|-------------|---------------------------------------|--------------------------------------|---------------------------------------|--------------------------------------|
| <b>MONOTERPENES</b>                  |        |             |                                       |                                      |                                       |                                      |
|                                      | 6.986  | 80-56-8     |                                       |                                      |                                       |                                      |
| $\alpha$ -Pinene                     |        |             | 49.33 $\pm$ 4.51 a                    | -                                    | 39.57 $\pm$ 2.64 a                    | -                                    |
| $\alpha$ -Fenchene                   | 8.211  | 471-84-1    | 0.27 $\pm$ 0.04 a                     | -                                    | 0.14 $\pm$ 0.01 a                     | -                                    |
| $\beta$ -Pinene                      | 9.753  | 18172-67-3  | 3.71 $\pm$ 0.22 b                     | 0.19 $\pm$ 0.04 a                    | 3.85 $\pm$ 0.19 b                     | 0.15 $\pm$ 0.13 a                    |
| Sabinene                             | 10.282 | 3387-41-5   | 0.23 $\pm$ 0.05 a                     | -                                    | -                                     | 0.06 $\pm$ 0.02 b                    |
| Thujene                              | 10.329 | 3387-41-5   | -                                     | -                                    | -                                     | 0.11 $\pm$ 0.01                      |
| $\beta$ -Myrcene                     | 12.215 | 123-35-3    | -                                     | 0.09 $\pm$ 0.03 a                    | 0.90 $\pm$ 0.04 b                     | 1.30 $\pm$ 0.23 b                    |
| $\alpha$ -Terpinene                  | 12.850 | 99-86-5     | 0.29 $\pm$ 0.04                       | -                                    | -                                     | -                                    |
| <i>D</i> -Limonene                   | 13.751 | 5989-27-5   | 2.36 $\pm$ 0.18 b                     | -                                    | 1.18 $\pm$ 0.09 b                     | 0.09 $\pm$ 0.15 a                    |
| <i>trans</i> - $\beta$ -Ocimene      | 15.434 | 3779-61-1   | -                                     | -                                    | 0.12 $\pm$ 0.005                      | 0.04 $\pm$ 0.007                     |
| $\gamma$ -Terpinene                  | 15.886 | 99-85-4     | 1.13 $\pm$ 0.09 a                     | -                                    | 0.07 $\pm$ 0.05 b                     | 0.06 $\pm$ 0.009 b                   |
| <i>p</i> -Cymene                     | 17.032 | 99-87-6     | 0.96 $\pm$ 0.05 a                     | -                                    | 0.20 $\pm$ 0.02 b                     | 0.06 $\pm$ 0.02 c                    |
| <i>p</i> -Cymenene                   | 24.480 | 1195-32-0   | 0.14 $\pm$ 0.002 a                    |                                      | 0.06 $\pm$ 0.004 b                    | -                                    |
| $\alpha$ -Funebrene                  | 29.387 | 50894-66-1  | 0.73 $\pm$ 0.14                       |                                      | -                                     | -                                    |
| <i>E</i> -Farnesene                  | 32.821 | 18794-84-8  | -                                     | 0.13 $\pm$ 0.03 a                    | -                                     | 0.17 $\pm$ 0.02 a                    |
| <b>TOTAL</b>                         |        |             | <b>59.15 <math>\pm</math> 5.322 c</b> | <b>0.41 <math>\pm</math> 0.10 a</b>  | <b>46.09 <math>\pm</math> 3.049 c</b> | <b>2.04 <math>\pm</math> 0.596 b</b> |
| <b>SESQUITERPENES</b>                |        |             |                                       |                                      |                                       |                                      |
|                                      | 27.896 |             |                                       |                                      |                                       |                                      |
| $\beta$ -Bourbonene                  |        |             | 0.29 $\pm$ 0.05                       | -                                    | -                                     | -                                    |
| Caryophyllene                        | 29.624 | 87-44-5     | 0.17 $\pm$ 0.02 b                     | -                                    | 1.44 $\pm$ 0.45 a                     | -                                    |
| $\alpha$ -Bergamotene                | 29.926 | 18252-46-5  | 0.41 $\pm$ 0.07                       | -                                    | -                                     | -                                    |
| <i>trans</i> - $\alpha$ -Bergamotene | 30.591 | 13474-59-4  | 0.63 $\pm$ 0.20                       | -                                    | -                                     | -                                    |
| <i>E</i> -Caryophyllene              | 31.121 | 13877-93-5  | 2.48 $\pm$ 0.03 a                     | -                                    | 1.86 $\pm$ 0.04 a                     | -                                    |
| Bicyclogermacrene                    | 31.616 | 136296-37-2 | 0.14 $\pm$ 0.001 b                    | -                                    | 0.07 $\pm$ 0.001 a                    | -                                    |
| $\beta$ -Ylangene                    | 31.735 | 20479-06-5  | 0.09 $\pm$ 0.002                      | -                                    | -                                     | -                                    |
| $\alpha$ -Muurolene                  | 32.669 | 10208-80-7  | 0.39 $\pm$ 0.04 a                     | -                                    | -                                     | 0.21 $\pm$ 0.03 a                    |
| $\alpha$ -Humulene                   | 32.963 | 6753-98-6   | 0.13 $\pm$ 0.01 a                     | -                                    | 0.15 $\pm$ 0.01 a                     | -                                    |
| <i>D</i> -Germacrene                 | 33.554 | 23986-74-5  | -                                     | 0.05 $\pm$ 0.01                      | -                                     | -                                    |
| $\beta$ -Bisabolene                  | 33.739 | 4891-79-6   | -                                     | -                                    | -                                     | 0.04 $\pm$ 0.005                     |
| $\beta$ -curcumene                   | 33.900 | 28976-67-2  | -                                     | 0.41 $\pm$ 0.07 b                    | -                                     | 0.15 $\pm$ 0.02 a                    |
| $\delta$ -Cadinene                   | 34.136 | 16729-01-4  | 1.45 $\pm$ 0.17 a                     | 0.22 $\pm$ 0.02 ab                   | 0.06 $\pm$ 0.002 b                    | -                                    |
| $\alpha$ -Cadinene                   | 34.508 | 82468-90-4  | 0.09 $\pm$ 0.01 a                     | 0.04 $\pm$ 0.001 a                   | -                                     | -                                    |
| <i>cis</i> -Calamenene               | 34.883 | 72937-55-4  | 2.96 $\pm$ 1.47                       | -                                    | -                                     | -                                    |
| <i>trans</i> -Muurolo-3,5-diene      | 32.210 | 189165-77-3 | 1.19 $\pm$ 0.15                       | -                                    | -                                     | -                                    |
| <i>cis</i> - $\beta$ -Santalene      | 32.256 | 25532-78-9  | 0.22 $\pm$ 0.03 a                     | 0.03 $\pm$ 0.005 b                   | -                                     | -                                    |
| $\beta$ -Santalene                   | 32.567 | 81967-89-7  | -                                     | 0.07 $\pm$ 0.01                      | -                                     | -                                    |
| $\alpha$ -Gurjunene                  | 28.347 | 489-40-7    | 0.58 $\pm$ 0.05                       | -                                    | -                                     | -                                    |
| $\gamma$ -Muurolene                  | 33.268 | 30021-74-0  | 0.18 $\pm$ 0.02                       | -                                    | -                                     | -                                    |
| Selina-4,11-diene                    | 33.315 | 17627-30-4  | -                                     | -                                    | 0.05 $\pm$ 0.0                        | -                                    |
| $\alpha$ -Guaiene                    | 33.647 |             | 0.27 $\pm$ 0.03                       | -                                    | -                                     | -                                    |
| Naphtalene                           | 33.710 | 17066-67-0  | -                                     | -                                    | 0.66 $\pm$ 0.03 a                     | 0.14 $\pm$ 0.02 b                    |
| $\beta$ -Bisabolene                  | 33.739 | 4891-79-6   | -                                     | 0.29 $\pm$ 0.07                      | -                                     | -                                    |
| $\alpha$ -Selinene                   | 33.767 | 473-13-2    | 0.17 $\pm$ 0.01 a                     | -                                    | 0.55 $\pm$ 0.04 b                     | -                                    |
| $\gamma$ -Selinene                   | 34.409 | 58893-88-2  | 1.08 $\pm$ 0.16 b                     |                                      | 0.10 $\pm$ 0.05 a                     | -                                    |
| $\alpha$ -Calacorene                 | 35.618 | 77129-50-1  | 0.12 $\pm$ 0.02                       | -                                    | -                                     | -                                    |
| Geranyl isovalerate                  | 34.538 | 109-20-6    | -                                     | -                                    | 0.06 $\pm$ 0.004                      | -                                    |
| <b>TOTAL</b>                         |        |             | <b>13.04 <math>\pm</math> 2.543 c</b> | <b>1.11 <math>\pm</math> 0.186 a</b> | <b>5.00 <math>\pm</math> 0.627 b</b>  | <b>0.54 <math>\pm</math> 0.075 a</b> |

|                            |        |             |                        |                        |                        |                        |
|----------------------------|--------|-------------|------------------------|------------------------|------------------------|------------------------|
| <b>ALDEHYDES</b>           |        |             |                        |                        |                        |                        |
| Hexanal                    | 9.123  | 66-25-1     | 4.38 ± 0.12 a          | 4.68 ± 0.25 ab         | 5.45 ± 0.19 b          | 8.70 ± 0.13 c          |
| <i>E</i> -2-Pentenal       | 11.045 | 1576-87-0   | -                      | -                      | 0.13 ± 0.01            | -                      |
| 3-Hexenal                  | 11.548 | 4440-65-7   | -                      | -                      | 0.08 ± 0.04            | -                      |
| <i>E</i> -2-Hexenal        | 14.111 | 6728-26-3   | -                      | 0.21 ± 0.08 a          | 0.69 ± 0.18 b          | 0.33 ± 0.003 a         |
| 2-Hexenal                  | 14.815 | 505-57-7    | 9.96 ± 0.87 a          | 11.89 ± 1.15 ab        | 16.06 ± 1.33 b         | 12.62 ± 1.11 ab        |
| <i>E,E</i> -2,4-Hexadienal | 23.023 | 142-83-6    | 0.13 ± 0.01 a          | 0.16 ± 0.02 a          | 0.43 ± 0.03 c          | 0.33 ± 0.01 b          |
| Benzaldehyde               | 28.163 | 100-52-7    | 0.93 ± 0.09 c          | 0.07 ± 0.001 ab        | 0.29 ± 0.09 b          | 0.06 ± 0.01 a          |
| $\alpha$ -Citral           | 33.851 | 5392-40-5   | 0.04 ± 0.002           | -                      | -                      | -                      |
| <b>TOTAL</b>               |        |             | <b>15.44 ± 1.092 a</b> | <b>17.01 ± 1.501 a</b> | <b>23.40 ± 1.87 b</b>  | <b>22.04 ± 1.263 b</b> |
| <b>ALCOHOLS</b>            |        |             |                        |                        |                        |                        |
| 1-Penten-3-ol              | 12.522 | 616-25-1    | 0.45 ± 0.04 a          | 0.17 ± 0.01c           | 0.66 ± 0.01 d          | 0.09 ± 0.02 b          |
| 1-Butanol                  | 14.614 | 137-32-6    | 0.64 ± 0.04 a          | 0.06 ± 0.06 b          | -                      | -                      |
| 1-Hexanol                  | 21.080 | 111-27-3    | -                      | -                      | -                      | 0.05 ± 0.02            |
| <i>Z</i> -2-Penten-1-ol    | 19.621 | 1576-95-0   | 0.12 ± 0.005 b         | 0.06 ± 0.001 a         | 0.19 ± 0.005 b         | -                      |
| <i>Z</i> -3-Hexen-1-ol     | 22.435 | 928-96-1    | 0.19 ± 0.02 a          | 0.10 ± 0.003 a         | 0.13 ± 0.003 a         | -                      |
| <i>Z</i> -2-Hexen-1-ol     | 23.400 | 928-95-0    | 0.16 ± 0.02 a          | 0.22 ± 0.02 a          | 0.16 ± 0.03 a          | -                      |
| $\beta$ -Acorenol          | 32.792 | 16729-00-3  | 0.38 ± 0.06 a          | 0.07 ± 0.02 b          | -                      | -                      |
| $\alpha$ -copaen-4-ol      | 33.562 | 18252-44-3  | -                      | -                      | 0.03 ± 0.001           | -                      |
| Nerol                      | 34.548 | 106-25-2    | 1.21 ± 1.18 b          | 0.05 ± 0.001 a         | -                      | -                      |
| Geraniol                   | 34.916 | 106-24-1    | -                      | 0.15 ± 0.05 a          | 0.16 ± 0.004 a         | 0.07 ± 0.01 b          |
| Benzyl alcohol             | 35.218 | 100-51-6    | 1.15 ± 0.55 a          | 0.10 ± 0.01 a          | 0.33 ± 0.05 a          | 0.06 ± 0.02 a          |
| Phenylethyl alcohol        | 35.539 | 60-12-8     | 0.14 ± 0.02 a          | 0.34 ± 0.04 ab         | 1.08 ± 0.09 b          | 0.69 ± 0.35 ab         |
| <b>TOTAL</b>               |        |             | <b>4.44 ± 1.935 b</b>  | <b>1.32 ± 0.215 ab</b> | <b>2.74 ± 0.193 ab</b> | <b>0.96 ± 0.42 a</b>   |
| <b>KETONES</b>             |        |             |                        |                        |                        |                        |
| 2-Cyclopenten-1-one        | 21.634 | 1120-73-6   | -                      | -                      | 0.04 ± 0.003           | -                      |
| 3-Octanone                 | 29.034 | 6137-15-1   | -                      | -                      | 0.05 ± 0.004           | -                      |
| <b>TOTAL</b>               |        |             |                        |                        | <b>0.09 ± 0.007</b>    |                        |
| <b>HYDROCARBONS</b>        |        |             |                        |                        |                        |                        |
| Norbornane                 | 8.430  | 497-32-5    | 3.72 ± 0.33 a          | -                      | 2.28 ± 0.12 b          | -                      |
| Tridecane                  | 8.705  | 13287-21-3  | -                      | 0.11 ± 0.02            | -                      | -                      |
| 1,3,6-Octatriene           | 16.184 | 3338-55-4   | -                      | -                      | 0.11 ± 0.003           | -                      |
| Cyclohexene                | 17.594 | 586-62-9    | 0.69 ± 0.05            | -                      | -                      | -                      |
| Pentadecane                | 26.699 | 629-62-9    | 0.50 ± 0.04            | -                      | -                      | -                      |
| Bicyclo[7.2.0]undecane     | 31.724 | 136296-38-3 | -                      | -                      | 0.07 ± 0.001           | -                      |
| <i>n</i> -Heptadecane      | 33.204 | 629-78-7    | 0.22 ± 0.07 b          | 0.54 ± 0.17 c          | 0.54 ± 0.09 c          | 0.11 ± 0.02 a          |
| <i>n</i> -Hexadecene       | 33.497 | 629-73-2    | -                      | 0.09 ± 0.04 b          | -                      | 0.02 ± 0.003 a         |
| 1,3-cyclohexadiene         | 33.654 | 495-60-3    | -                      | 0.29 ± 0.06            | -                      | -                      |
| 1,4-Cyclohex-2-enedione    | 33.924 | 4505-38-8   | 0.15 ± 0.01 a          | -                      | 0.19 ± 0.02 b          | 0.14 ± 0.005 a         |
| <i>n</i> -Nonadecane       | 35.177 | 629-92-5    | 0.64 ± 0.36 a          | 0.86 ± 0.19 a          | 1.10 ± 0.12 a          | 0.73 ± 0.13 a          |
| Henicos-1-ene              | 35.328 | 1599-68-4   | 0.19 ± 0.01 b          | 0.09 ± 0.02 a          | 0.09 ± 0.01 a          | 0.21 ± 0.03 b          |
| Heptadecane                | 35.938 | 629-78-7    | -                      | -                      | 0.02 ± 0.0             | -                      |
| Henicosane                 | 36.770 | 629-94-7    | 0.06 ± 0.006 a         | 0.06 ± 0.01 a          | 0.08 ± 0.04 a          | 0.11 ± 0.02a           |
| <b>TOTAL</b>               |        |             | <b>6.17 ± 0.876 b</b>  | <b>2.04 ± 0.51 a</b>   | <b>4.48 ± 0.404 b</b>  | <b>1.32 ± 0.208 a</b>  |
| <b>PHENYLPROPENES</b>      |        |             |                        |                        |                        |                        |
| Methyl eugenol             | 36.285 | 93-15-2     | -                      | -                      | 0.04 ± 0.006           | -                      |
| <b>OTHER COMPOUNDS</b>     |        |             |                        |                        |                        |                        |
| 2-Buteonic acid            | 31.092 | 61692-78-2  | -                      | 0.21 ± 0.03 b          | -                      | 0.10 ± 0.004 a         |

|                      |        |          |                         |                        |                        |                        |
|----------------------|--------|----------|-------------------------|------------------------|------------------------|------------------------|
| Acetic acid          | 32.810 | 150-84-5 | -                       | -                      | 1.37 ± 0.12            | -                      |
| Benzene              | 34.265 | 644-30-4 | -                       | 1.98 ± 0.35            | -                      | -                      |
| <i>n</i> -Octadecane | 34.348 | 593-45-3 | -                       | -                      | 0.03 ± 0.05            | -                      |
| <b>TOTAL</b>         |        |          |                         | <b>2.19 ± 0.38 b</b>   | <b>1.40 ± 0.17 b</b>   | <b>0.10 ± 0.004 a</b>  |
| <b>TOTAL</b>         |        |          | <b>98.24 ± 11.768 b</b> | <b>24.08 ± 2.892 a</b> | <b>83.24 ± 6.272 b</b> | <b>27.00 ± 2.548 a</b> |

**Table S2.** Content and composition of the volatile phase (µg IS equivalents/g sample) in *R. spinosissima* and its derived cultivars. Results are expressed as compound concentration per 3-nonanone standard.

|                            | Rt     | Cas ID     | <i>R. spinosissima</i> | 'Frühlingsmorgen'     | 'Frühlingsduft'      | 'Karl Foerster'       | 'Mon amie Claire'    | 'Maigold'             | 'Frühlingsgold'        |
|----------------------------|--------|------------|------------------------|-----------------------|----------------------|-----------------------|----------------------|-----------------------|------------------------|
| <b>MONOTERPENS</b>         |        |            |                        |                       |                      |                       |                      |                       |                        |
| <i>β</i> -Pinene           | 9.744  | 18172-67-3 | -                      | -                     | -                    | -                     | -                    | -                     | 0.12 ± 0.03            |
| <i>β</i> -Myrcene          | 12.215 | 123-35-3   | 0.08 ± 0.02 a          | 0.16 ± 0.02 b         | -                    | -                     | -                    | 1.99 ± 0.26 d         | 0.64 ± 0.16 c          |
| <i>D</i> -Limonene         | 13.700 | 5989-27-5  | -                      | -                     | -                    | -                     | -                    | 0.37 ± 0.05 b         | 0.16 ± 0.03 a          |
| <i>trans-β</i> -Ocimene    | 15.435 | 3779-61-1  | -                      | -                     | -                    | -                     | -                    | 0.62 ± 0.09 b         | 0.20 ± 0.05 a          |
| <i>β</i> -Ocimene          | 16.177 | 13877-91-3 | -                      | 0.07 ± 0.01           | -                    | -                     | -                    | -                     | -                      |
| <b>TOTAL</b>               |        |            | <b>0.08 ± 0.02 a</b>   | <b>0.23 ± 0.03 b</b>  |                      |                       |                      | <b>2.98 ± 0.40 c</b>  | <b>1.12 ± 0.27 c</b>   |
| <b>SESQUITERPENES</b>      |        |            |                        |                       |                      |                       |                      |                       |                        |
| Naphtalene                 | 26.676 | 17066-67-0 | -                      | -                     | -                    | 0.26 ± 0.02 a         | -                    | 0.21 ± 0.006 a        | -                      |
| <i>E</i> -Caryophyllene    | 31.111 | 13877-93-5 | -                      | -                     | -                    | 0.25 ± 0.002 a        | 0.12 ± 0.01 a        | -                     | -                      |
| Caryophyllene              | 31.114 | 87-44-5    | -                      | 0.10 ± 0.02 a         | 0.18 ± 0.01 a        | -                     | 0.16 ± 0.01 a        | -                     | 0.24 ± 0.01 a          |
| <i>α</i> -Humulene         | 32.970 | 6753-98-6  | -                      | -                     | -                    | -                     | -                    | -                     | 0.05 ± 0.007           |
| <i>γ</i> -Muuroolene       | 33.265 | 30021-74-0 | -                      | -                     | -                    | -                     | -                    | 0.04 ± 0.001          | -                      |
| <i>D</i> -Germacrene       | 33.557 | 23986-74-5 | -                      | -                     | 0.26 ± 0.02          | -                     | -                    | -                     | -                      |
| <i>β</i> -Bisabolene       | 33.738 | 4891-79-6  | -                      | -                     | -                    | -                     | -                    | -                     | 0.05 ± 0.01            |
| <i>α</i> -Muuroolene       | 33.745 | 10208-80-7 | -                      | 0.12 ± 0.02           | -                    | -                     | -                    | -                     | -                      |
| <i>δ</i> -Cadinene         | 34.129 | 16729-01-4 | -                      | 0.02 ± 0.003 a        | 0.17 ± 0.02 ab       | -                     | -                    | 0.37 ± 0.009 b        | -                      |
| Geranyl isovalerate        | 34.537 | 109-20-6   | 0.03 ± 0.007           | -                     | -                    | -                     | -                    | -                     | -                      |
| <b>TOTAL</b>               |        |            | <b>0.03 ± 0.007 a</b>  | <b>0.24 ± 0.043 b</b> | <b>0.61 ± 0.05 c</b> | <b>0.51 ± 0.022 c</b> | <b>0.28 ± 0.02 b</b> | <b>0.62 ± 0.02 c</b>  | <b>0.34 ± 0.027 bc</b> |
| <b>ALDEHYDES</b>           |        |            |                        |                       |                      |                       |                      |                       |                        |
| 3-Hexenal                  | 11.340 | 4440-65-7  | -                      | -                     | -                    | -                     | -                    | -                     | 0.08 ± 0.01            |
| Hexenal                    | 9.109  | 66-25-1    | 5.32 ± 0.57 a          | 12.95 ± 0.86 ab       | -                    | -                     | -                    | 53.26 ± 2.27 c        | 26.74 ± 0.87 b         |
| <i>E</i> -2-Pentenal       | 11.069 | 1576-87-0  | -                      | -                     | -                    | -                     | -                    | -                     | 0.12 ± 0.01            |
| Heptanal                   | 13.336 | 111-71-7   | -                      | -                     | -                    | -                     | -                    | 0.17 ± 0.01 b         | 0.07 ± 0.002 a         |
| <i>E</i> -2-Hexenal        | 14.109 | 6728-26-3  | 6.89 ± 0.85 b          | 5.75 ± 0.32 b         | -                    | -                     | -                    | 0.39 ± 0.03 a         | -                      |
| 2-Hexenal                  | 14.821 | 505-57-7   | -                      | -                     | -                    | -                     | -                    | 15.02 ± 0.82 a        | 12.63 ± 0.55 a         |
| <i>E,E</i> -2,4-Hexadienal | 23.038 | 142-83-6   | 0.21 ± 0.03 a          | 0.19 ± 0.02 a         | 0.39 ± 0.03 b        | 0.66 ± 0.03 c         | 0.33 ± 0.01 b        | 0.37 ± 0.01 b         | 0.37 ± 0.02 b          |
| Benzaldehyde               | 28.184 | 100-52-7   | 0.26 ± 0.05 a          | 0.32 ± 0.04 a         | 0.37 ± 0.04 a        | 0.27 ± 0.09 a         | 0.27 ± 0.02 a        | 0.21 ± 0.04 a         | 0.79 ± 0.11 b          |
| <i>α</i> -Citral           | 33.847 | 5392-40-5  | 0.11 ± 0.03 a          | 0.09 ± 0.02 a         | 0.28 ± 0.09 a        | 0.14 ± 0.03 a         | -                    | 0.15 ± 0.02 a         | 0.16 ± 0.04 a          |
| <b>TOTAL</b>               |        |            | <b>12.79 ± 1.53 c</b>  | <b>19.30 ± 1.26 c</b> | <b>1.04 ± 0.16 b</b> | <b>1.07 ± 0.15 b</b>  | <b>0.30 ± 0.03 a</b> | <b>69.57 ± 3.20 d</b> | <b>40.96 ± 1.612 d</b> |
| <b>ALCOHOLS</b>            |        |            |                        |                       |                      |                       |                      |                       |                        |
| 1-Penten-3-ol              | 12.541 | 616-25-1   | 0.11 ± 0.03 a          | 0.15 ± 0.01 a         | -                    | -                     | -                    | 0.35 ± 0.02 b         | 0.29 ± 0.01 b          |
| 1-Butanol                  | 14.619 | 137-32-6   | 0.08 ± 0.01 a          | 0.42 ± 0.03 b         | -                    | -                     | -                    | -                     | 0.16 ± 0.03 a          |
| <i>Z</i> -2-Penten-1-ol    | 19.626 | 1576-95-0  | -                      | -                     | -                    | 0.20 ± 0.002 b        | 0.14 ± 0.003 b       | 0.09 ± 0.001 a        | 0.06 ± 0.01 a          |
| 1-Hexanol                  | 21.080 | 111-27-3   | -                      | -                     | 1.12 ± 0.18          | -                     | -                    | -                     | -                      |

|                         |        |            |                        |                        |                        |                       |                        |                                  |                        |
|-------------------------|--------|------------|------------------------|------------------------|------------------------|-----------------------|------------------------|----------------------------------|------------------------|
| Z-3-Hexen-1-ol          | 22.457 | 928-96-1   | -                      | -                      | 0.07 ± 0.003 a         | -                     | 0.10 ± 0.02 a          | 0.13 ± 0.005 a                   | -                      |
| Linalool                | 29.304 | 78-70-6    | 0.06 ± 0.01 a          | -                      | 0.09 ± 0.02 a          | -                     | 0.10 ± 0.01 a          | -                                | 0.05 ± 0.01 a          |
| Lavanduol               | 34.080 | 141-12-8   | -                      | -                      | 0.23 ± 0.06 a          | -                     | -                      | 1.52 ± 0.14 b                    | 0.36 ± 0.14 a          |
| Citronellol             | 34.199 | 6812-78-8  | -                      | -                      | 0.83 ± 0.05 a          | -                     | 1.78 ± 0.24 b          | -                                | -                      |
| Nerol                   | 34.923 | 106-25-2   | -                      | -                      | 0.23 ± 0.05 b          | 0.08 ± 0.01 a         | 0.16 ± 0.02 b          | 0.19 ± 0.02 b                    | 0.06 ± 0.02 a          |
| Geraniol                | 34.916 | 106-24-1   | 0.07 ± 0.01 a          | 0.19 ± 0.03 ab         | 0.53 ± 0.05 bc         | 0.19 ± 0.01 ab        | 0.32 ± 0.09 ac         | 0.62 ± 0.11 c                    | 0.35 ± 0.15 ac         |
| Benzyl alcohol          | 35.222 | 100-51-6   | 0.26 ± 0.08 a          | -                      | 0.16 ± 0.03 a          | 0.28 ± 0.12 a         | 0.17 ± 0.01 a          | 0.20 ± 0.05 a                    | 0.75 ± 0.21 b          |
| Phenylethyl alcohol     | 35.534 | 60-12-8    | 0.92 ± 0.27 a          | 1.47 ± 0.35 b          | 6.48 ± 1.67            | 0.72 ± 0.16 a         | 3.18 ± 0.28 c          | 3.28 ± 1.01 c<br>6.38 ± 1.356    | 3.96 ± 1.12 c          |
| <b>TOTAL</b>            |        |            | <b>1.50 ± 0.41 a</b>   | <b>2.23 ± 0.42 a</b>   | <b>9.74 ± 2.113 c</b>  | <b>1.47 ± 0.302 a</b> | <b>5.95 ± 0.655 b</b>  | <b>b</b>                         | <b>6.04 ± 1.70 b</b>   |
| <b>KETONES</b>          |        |            |                        |                        |                        |                       |                        |                                  |                        |
| 2-Cyclopenten-1-one     | 21.627 | 1120-73-6  | -                      | -                      | -                      | 0.09 ± 0.006          | -                      | -                                | -                      |
| 3-Octanone              | 29.056 | 6137-15-1  | -                      | -                      | -                      | 0.10 ± 0.001          | -                      | -                                | -                      |
| 1,4-Cyclohex-2-enedione | 33.929 | 4505-38-8  | 0.01 ± 0.01 a          | 0.08 ± 0.01 a          | 0.19 ± 0.01 a          | 0.33 ± 0.01 b         | -                      | 0.19 ± 0.003 a<br>0.19 ± 0.003 a | 0.15 ± 0.008 a         |
| <b>TOTAL</b>            |        |            | <b>0.01 ± 0.01 a</b>   | <b>0.08 ± 0.01 a</b>   | <b>0.19 ± 0.01 a</b>   | <b>0.52 ± 0.017 b</b> |                        | <b>0.003 a</b>                   | <b>0.15 ± 0.008 a</b>  |
| <b>HYDROCARBONS</b>     |        |            |                        |                        |                        |                       |                        |                                  |                        |
| Dodecane                | 8.349  | 31295-56-4 | 0.12 ± 0.01 b          | -                      | -                      | -                     | -                      | -                                | 0.07 ± 0.03 a          |
| 1,3,6-Octatriene        | 16.185 | 3338-55-4  | -                      | -                      | -                      | -                     | -                      | 0.91 ± 0.11 b                    | 0.32 ± 0.08 a          |
| <i>n</i> -Nonadecane    | 20.999 | 925-78-0   | 2.98 ± 0.41 b          | 2.50 ± 0.17 a          | 6.99 ± 1.09            | 1.43 ± 0.05 a         | 2.71 ± 0.31 b          | 2.51 ± 0.32 a                    | 2.61 ± 0.21 a          |
| <i>n</i> -Pentadecane   | 26.699 | 629-62-9   | 0.06 ± 0.01            | -                      | -                      | -                     | -                      | -                                | -                      |
| <i>n</i> -Heptadecane   | 33.207 | 629-78-7   | 1.55 ± 0.31 b          | 0.24 ± 0.01 a          | 0.48 ± 0.05 ab         | 0.46 ± 0.09 ab        | 0.13 ± 0.01 a          | 0.63 ± 0.05 ab                   | 0.45 ± 0.04 ab         |
| Hexadecene              | 33.489 | 629-73-2   | 0.18 ± 0.03 a          | 0.04 ± 0.003 a         | 0.84 ± 0.17 b          | 0.24 ± 0.05 a         | -                      | -                                | 0.19 ± 0.01 a          |
| 1,3-cyclohexadiene      | 33.652 | 495-60-3   | -                      | -                      | 0.04 ± 0.004           | -                     | -                      | -                                | -                      |
| <i>n</i> -Octadecane    | 34.355 | 593-45-3   | 0.05 ± 0.01 a          | 0.03 ± 0.01 a          | 0.15 ± 0.02 b          | -                     | -                      | -                                | -                      |
| 5-Heptadecene           | 34.861 | 56600-21-6 | -                      | -                      | 0.23 ± 0.02 b          | 0.09 ± 0.01 a         | 0.04 ± 0.01 a          | 0.12 ± 0.004 b                   | 0.07 ± 0.004 a         |
| Heptadecane             | 35.941 | 629-78-7   | -                      | -                      | 0.21 ± 0.06 b          | -                     | -                      | 0.05 ± 0.01 a                    | 0.07 ± 0.005 a         |
| Heneicosane             | 36.773 | 629-97-0   | 0.48 ± 0.05 b          | -                      | 0.81 ± 0.02 a          | 0.42 ± 0.04 a         | 0.60 ± 0.05 a          | 0.41 ± 0.02 b                    | 0.68 ± 0.04 a          |
| Henicos-1-ene           | 36.957 | 1599-68-4  | 0.39 ± 0.22 a          | 0.84 ± 0.09 ab         | 2.45 ± 0.42 b          | 0.77 ± 0.12 ab        | 0.38 ± 0.05 a          | 3.4 ± 0.33 b                     | 1.11 ± 0.122 ab        |
| 3,5-Dimethoxytoluene    | 34.982 | 4179-19-5  | -                      | -                      | 0.10 ± 0.02a           | 0.04 ± 0.002a         | -                      | 0.57 ± 0.02b<br>8.60 ± 0.864     | 0.04 ± 0.004a          |
| <b>TOTAL</b>            |        |            | <b>5.81 ± 1.05 ab</b>  | <b>3.65 ± 0.283 a</b>  | <b>12.30 ± 1.874 b</b> | <b>3.45 ± 0.362 a</b> | <b>3.32 ± 0.43 a</b>   | <b>ab</b>                        | <b>5.22 ± 0.437 ab</b> |
| <b>PHENYLPROPENES</b>   |        |            |                        |                        |                        |                       |                        |                                  |                        |
| Methyl eugenol          | 36.291 | 93-15-2    | 0.28 ± 0.04 b          | 0.03 ± 0.003 a         | 0.11 ± 0.03 a          | -                     | 0.15 ± 0.02 ab         | 0.05 ± 0.03 a                    | 0.06 ± 0.007 a         |
| <b>OTHER COMPOUNDS</b>  |        |            |                        |                        |                        |                       |                        |                                  |                        |
| 2-Butenoic acid         | 31.105 | 61692-78-2 | 0.07 ± 0.01 a          | -                      | -                      | -                     | -                      | 0.33 ± 0.007 b                   | -                      |
| Acetic acid             | 36.116 | 150-84-5   | 0.05 ± 0.01 a          | 0.03 ± 0.005 a         | 0.09 ± 0.01 a          | 0.03 ± 0.002 a        | 0.11 ± 0.01 a          | 1.43 ± 0.22 b<br>1.76 ± 0.227    | 0.12 ± 0.01 a          |
| <b>TOTAL</b>            |        |            | <b>0.12 ± 0.02 a</b>   | <b>0.03 ± 0.005 a</b>  | <b>0.09 ± 0.01 a</b>   | <b>0.03 ± 0.002 a</b> | <b>0.11 ± 0.01 a</b>   | <b>b</b>                         | <b>0.12 ± 0.01 a</b>   |
| <b>TOTAL</b>            |        |            | <b>20.62 ± 3.087 b</b> | <b>2.579 ± 2.054 a</b> | <b>24.08 ± 4.247 b</b> | <b>7.05 ± 0.855 a</b> | <b>10.11 ± 1.165 a</b> | <b>90.15 ± 6.10 d</b>            | <b>54.40 ± 4.071 c</b> |

**Table S3.** Content and composition of the volatile phase (µg IS equivalents/g sample) in *R. gallica* and its derived cultivars. Results are expressed as compound concentration per 3-nonanone standard.

|                     | Rt     | Cas ID     | <i>R. gallica</i> | 'Charles de Mills' | 'Violacea'       | 'Splendens'   | 'Complicata'   |
|---------------------|--------|------------|-------------------|--------------------|------------------|---------------|----------------|
| <b>MONOTERPENES</b> |        |            |                   |                    |                  |               |                |
|                     | 6.962  | 80-56-8    |                   |                    |                  |               |                |
| <i>α</i> -Pinene    |        |            | 2.85 ± 0.69 a     | 1.94 ± 1.10 a      | 107.77 ± 13.94 c | -             | 11.43 ± 2.63 b |
| <i>α</i> -Fenchene  | 8.198  | 471-84-1   | -                 | -                  | 0.48 ± 0.06      | -             | -              |
| <i>β</i> -Pinene    | 9.672  | 18172-67-3 | 0.33 ± 0.14 a     | 1.38 ± 0.14 b      | 11.99 ± 1.79 c   | -             | 1.39 ± 0.32 b  |
| Thujene             | 10.361 | 3387-41-5  | -                 | -                  | 3.97 ± 2.78 b    | -             | 0.17 ± 0.04 a  |
| <i>β</i> -Myrcene   | 12.219 | 123-35-3   | 1.51 ± 0.17 a     | -                  | -                | 0.40 ± 0.06 a | 1.54 ± 0.21 a  |

|                                 |        |            |                                       |                                       |                                        |                                      |                                       |
|---------------------------------|--------|------------|---------------------------------------|---------------------------------------|----------------------------------------|--------------------------------------|---------------------------------------|
| $\alpha$ -Terpinene             | 12.837 | 99-86-5    | 0.03 $\pm$ 0.004 a                    | -                                     | 0.43 $\pm$ 0.09 b                      | -                                    | -                                     |
| D-Limonene                      | 13.779 | 5989-27-5  |                                       |                                       |                                        |                                      |                                       |
| Sabinene                        | 14.330 | 3387-41-5  | 0.26 $\pm$ 0.14 b                     | 0.07 $\pm$ 0.01 a                     | 0.29 $\pm$ 0.07 b                      | -                                    | -                                     |
| <i>trans</i> - $\beta$ -Ocimene | 15.405 | 3779-61-1  | -                                     | -                                     | -                                      | -                                    | 0.11 $\pm$ 0.01                       |
| $\gamma$ -Terpinene             | 15.820 | 99-85-4    | 0.15 $\pm$ 0.04 a                     | -                                     | 0.54 $\pm$ 0.31 b                      | 0.16 $\pm$ 0.02 a                    | -                                     |
| <i>E</i> - $\beta$ -Ocimene     | 16.115 | 3779-61-1  | 0.13 $\pm$ 0.02 a                     | 0.21 $\pm$ 0.03 a                     | 0.85 $\pm$ 0.20 b                      | -                                    | 0.11 $\pm$ 0.01 a                     |
| <i>p</i> -Cymene                | 16.984 | 99-87-6    | -                                     | -                                     | -                                      | 0.02 $\pm$ 0.02                      | -                                     |
| <b>TOTAL</b>                    |        |            | <b>5.26 <math>\pm</math> 1.204 ab</b> | <b>3.60 <math>\pm</math> 1.28 ab</b>  | <b>126.32 <math>\pm</math> 19.24 c</b> | <b>0.58 <math>\pm</math> 0.10 a</b>  | <b>14.75 <math>\pm</math> 3.22 b</b>  |
| <b>SESQUITERPENES</b>           |        |            |                                       |                                       |                                        |                                      |                                       |
| Naphtalene                      | 26.652 | 17066-67-0 | -                                     | 0.08 $\pm$ 0.01 a                     | -                                      | 0.14 $\pm$ 0.01 a                    | 0.06 $\pm$ 0.01 a                     |
| <i>cis</i> - $\beta$ -Santalene | 32.256 | 25532-78-9 | -                                     | -                                     | 0.08 $\pm$ 0.01                        | -                                    | -                                     |
| $\alpha$ -Humulene              | 32.950 | 6753-98-6  | 0.01 $\pm$ 0.003 a                    | 0.03 $\pm$ 0.003 a                    | -                                      | 0.03 $\pm$ 0.01 a                    | -                                     |
| Selina-4,11-diene               | 33.055 | 17627-30-4 | -                                     | 0.01 $\pm$ 0.001                      | -                                      | -                                    | -                                     |
| $\gamma$ -Muurolene             | 33.260 | 30021-74-0 | -                                     | -                                     | -                                      | 0.05 $\pm$ 0.01 a                    | 0.04 $\pm$ 0.004 a                    |
| D-Germacrene                    | 33.558 | 23986-74-5 | -                                     | -                                     | -                                      | 0.14 $\pm$ 0.01 a                    | 0.02 $\pm$ 0.002 a                    |
| $\alpha$ -Selinene              | 33.756 | 473-13-2   | -                                     | 0.05 $\pm$ 0.01                       | -                                      | -                                    | -                                     |
| $\delta$ -Cadinene              | 34.132 | 16729-01-4 | -                                     | 0.04 $\pm$ 0.008 a                    | -                                      | 0.12 $\pm$ 0.01 a                    | 0.06 $\pm$ 0.01 a                     |
| $\gamma$ -Selinene              | 34.405 | 58893-88-2 | 0.02 $\pm$ 0.002                      | -                                     | -                                      | -                                    | -                                     |
| <b>TOTAL</b>                    |        |            | <b>0.03 <math>\pm</math> 0.005 a</b>  | <b>0.21 <math>\pm</math> 0.024 ab</b> | <b>0.08 <math>\pm</math> 0.01 a</b>    | <b>0.48 <math>\pm</math> 0.05 b</b>  | <b>0.18 <math>\pm</math> 0.026 ab</b> |
| <b>ALDEHYDES</b>                |        |            |                                       |                                       |                                        |                                      |                                       |
| Hexanal                         | 9.103  | 66-25-1    | 13.49 $\pm$ 0.82                      | 19.18 $\pm$ 2.91                      | 12.32 $\pm$ 1.62                       | 7.81 $\pm$ 1.36                      | 6.35 $\pm$ 0.89                       |
| 3-Hexenal                       | 11.291 | 4440-65-7  | 0.08 $\pm$ 0.04                       | 0.05 $\pm$ 0.001                      | -                                      | 0.05 $\pm$ 0.01                      | -                                     |
| <i>E</i> -2-Hexenal             | 14.085 | 6728-26-3  | 0.25 $\pm$ 0.01                       | 0.25 $\pm$ 0.01                       | -                                      | 0.23 $\pm$ 0.01                      | 4.10 $\pm$ 0.46                       |
| 2-Hexenal                       | 14.815 | 505-57-7   | 7.70 $\pm$ 0.31                       | 8.78 $\pm$ 0.56                       | 7.68 $\pm$ 0.97                        | 9.59 $\pm$ 0.51                      | 0.17 $\pm$ 0.05                       |
| <i>E,E</i> -2,4-Hexadienal      | 23.046 | 142-83-6   | 0.22 $\pm$ 0.08                       | 0.25 $\pm$ 0.01                       | 0.09 $\pm$ 0.01                        | 0.26 $\pm$ 0.01                      | 0.12 $\pm$ 0.03                       |
| Benzaldehyde                    | 28.172 | 100-52-7   | 0.10 $\pm$ 0.01                       | 0.28 $\pm$ 0.03                       | 0.04 $\pm$ 0.005                       | 0.06 $\pm$ 0.01                      | -                                     |
| <b>TOTAL</b>                    |        |            | <b>21.84 <math>\pm</math> 1.27 b</b>  | <b>28.8 <math>\pm</math> 3.521 b</b>  | <b>20.13 <math>\pm</math> 2.605 b</b>  | <b>18.00 <math>\pm</math> 1.91 b</b> | <b>10.74 <math>\pm</math> 1.43 a</b>  |
| <b>ALCOHOLS</b>                 |        |            |                                       |                                       |                                        |                                      |                                       |
| 1-Penten-3-ol                   | 12.556 | 616-25-1   | 0.07 $\pm$ 0.01                       | -                                     | 0.78 $\pm$ 0.06                        | 0.15 $\pm$ 0.02                      | 0.10 $\pm$ 0.02                       |
| 1-Butanol                       | 14.602 | 123-51-3   | 0.1 $\pm$ 0.02                        | 0.16 $\pm$ 0.03                       | -                                      | 0.10 $\pm$ 0.02                      | -                                     |
| 1-Hexanol                       | 21.080 | 111-27-3   | -                                     | 0.61 $\pm$ 0.23                       | -                                      | -                                    | -                                     |
| Z-3-Hexen-1-ol                  | 22.453 | 928-96-1   | 0.07 $\pm$ 0.003                      | 0.09 $\pm$ 0.01                       | 0.20 $\pm$ 0.02                        | 0.06 $\pm$ 0.001                     | -                                     |
| Z-2-Hexen-1-ol                  | 23.416 | 928-95-0   | -                                     | 0.04 $\pm$ 0.003                      | -                                      | 0.07 $\pm$ 0.006                     | -                                     |
| <i>E</i> -2-Hexen-1-ol          | 23.420 | 928-95-0   | -                                     | -                                     | -                                      | -                                    | 0.22 $\pm$ 0.02                       |
| Linalool                        | 29.286 | 78-70-6    | 0.08 $\pm$ 0.03                       | 0.09 $\pm$ 0.01                       | 0.13 $\pm$ 0.03                        | 0.04 $\pm$ 0.002                     | -                                     |
| Lavanduol                       | 34.077 | 25905-14-0 | 0.1 $\pm$ 0.03                        | 0.05 $\pm$ 0.01                       | 0.09 $\pm$ 0.03                        | 0.09 $\pm$ 0.02                      | 0.05 $\pm$ 0.006                      |
| Nerol                           | 34.541 | 106-25-2   | 0.23 $\pm$ 0.01                       | -                                     | 0.35 $\pm$ 0.18                        | 0.23 $\pm$ 0.03                      | 0.13 $\pm$ 0.05                       |
| Geraniol                        | 34.920 | 106-24-1   | 0.29 $\pm$ 0.01                       | 0.86 $\pm$ 0.11                       | 1.11 $\pm$ 0.67                        | 0.29 $\pm$ 0.05                      | -                                     |
| Benzyl alcohol                  | 35.224 | 100-51-6   | -                                     | 0.47 $\pm$ 0.09                       | -                                      | -                                    | -                                     |
| Phenylethyl alcohol             | 35.532 | 60-12-8    | 1.51 $\pm$ 0.31                       | 3.10 $\pm$ 0.71                       | 1.79 $\pm$ 0.76                        | 0.57 $\pm$ 0.05                      | 0.95 $\pm$ 0.39                       |
| <b>TOTAL</b>                    |        |            | <b>2.45 <math>\pm</math> 0.423 ab</b> | <b>5.47 <math>\pm</math> 1.203 b</b>  | <b>4.45 <math>\pm</math> 1.75 b</b>    | <b>1.60 <math>\pm</math> 0.199 a</b> | <b>1.45 <math>\pm</math> 0.486 a</b>  |
| <b>KETONES</b>                  |        |            |                                       |                                       |                                        |                                      |                                       |
| 1,4-Cyclohex-2-enedione         | 33.931 | 4505-38-8  | 0.09 $\pm$ 0.003 a                    | 0.10 $\pm$ 0.008 a                    | 0.11 $\pm$ 0.01 a                      | 0.11 $\pm$ 0.009 a                   | 0.05 $\pm$ 0.008 a                    |
| <b>HYDROCARBONS</b>             |        |            |                                       |                                       |                                        |                                      |                                       |
| Norbornane                      | 8.443  | 497-32-5   | 0.10 $\pm$ 0.01 a                     | -                                     | 2.86 $\pm$ 0.35 b                      | -                                    | 0.23 $\pm$ 0.01 a                     |
| 1,3,6-Octatriene                | 16.154 | 3338-55-4  | 0.13 $\pm$ 0.21 a                     | 0.08 $\pm$ 0.004 a                    | 0.2 $\pm$ 0.03 a                       | -                                    | 0.12 $\pm$ 0.02 a                     |
| Cyclohexene                     | 17.569 | 586-62-9   | -                                     | -                                     | 1.03 $\pm$ 0.19 b                      | -                                    | 0.09 $\pm$ 0.02 a                     |
| Cyclohexasiloxane               | 17.704 | 540-97-6   | 0.08 $\pm$ 0.01 a                     | 0.07 $\pm$ 0.001 a                    | -                                      | -                                    | 0.03 $\pm$ 0.004 a                    |
| Pentadecane                     | 26.663 | 7399-49-7  | 0.04 $\pm$ 0.025                      | -                                     | -                                      | -                                    | -                                     |

|                         |        |            |                        |                       |                          |                        |                        |
|-------------------------|--------|------------|------------------------|-----------------------|--------------------------|------------------------|------------------------|
| Tridecane               | 27.654 | 13287-21-3 | -                      | 0.09 ± 0.004          | -                        | -                      | -                      |
| <i>E</i> -Caryophyllene | 31.114 | 13877-93-5 | -                      | 0.11 ± 0.003 a        | 1.04 ± 0.13 b            | -                      | 0.04 ± 0.01 a          |
| <i>n</i> -Heptadecane   | 33.209 | 629-78-7   | 0.88 ± 0.11 b          | 0.83 ± 0.14 b         | 2.85 ± 0.53 c            | 0.16 ± 0.02 a          | 0.21 ± 0.02 a          |
| <i>n</i> -Hexadecene    | 33.494 | 629-73-2   | 0.30 ± 0.04 ab         | 0.39 ± 0.08 ab        | 0.88 ± 0.14 b            | 0.04 ± 0.006 a         | 0.08 ± 0.02 a          |
| $\alpha$ -Citral        | 33.846 | 5392-40-5  | 0.07 ± 0.01 a          | 0.21 ± 0.04 b         | 0.23 ± 0.08 b            | 0.05 ± 0.01 a          | 0.03 ± 0.01 a          |
| Geranyl isovalerate     | 34.540 | 106-25-2   | -                      | 0.39 ± 0.05           | -                        | -                      | -                      |
| 5-Heptadecene           | 34.858 | 56600-21-6 | 0.07 ± 0.003 a         | 0.14 ± 0.007 a        | 0.16 ± 0.03a             | -                      | -                      |
| <i>n</i> -Nonadecane    | 35.173 | 629-92-5   | 4.28 ± 0.28 b          | 2.13 ± 0.18 a         | 6.74 ± 1.21 b            | 1.28 ± 0.02 a          | 1.76 ± 0.10 a          |
| Henicos-1-ene           | 35.331 | 1599-68-4  | 0.46 ± 0.09 a          | 0.19 ± 0.01 a         | 0.32 ± 0.05 a            | 0.27 ± 0.04 a          | 0.32 ± 0.02 a          |
| Heptadecane             | 35.945 | 629-78-7   | -                      | 0.05 ± 0.005 a        | 0.12 ± 0.02 a            | 0.04 ± 0.001 a         | -                      |
| Henicosane              | 36.775 | 629-94-7   | 0.57 ± 0.04 c          | 0.23 ± 0.02 b         | 0.58 ± 0.10 c            | 0.04 ± 0.0 a           | -                      |
| <b>TOTAL</b>            |        |            | <b>6.98 ± 0.828 b</b>  | <b>4.91 ± 0.544 b</b> | <b>17.01 ± 2.86 c</b>    | <b>1.93 ± 0.097 a</b>  | <b>2.91 ± 0.234 a</b>  |
| <b>PHENILYPROPENES</b>  |        |            |                        |                       |                          |                        |                        |
| Methyl eugenol          | 36.293 | 93-15-2    | -                      | -                     | -                        | -                      | 0.11 ± 0.02            |
| <b>OTHER COMPOUNDS</b>  |        |            |                        |                       |                          |                        |                        |
| 2-buteonic acid         | 31.101 | 61692-78-2 | 0.12 ± 0.003 a         | -                     | -                        | 0.37 ± 0.04 b          | -                      |
| butaonic acid           | 31.104 | 13877-93-5 | -                      | -                     | 0.14 ± 0.02              | -                      | -                      |
| Octadecane <n->         | 34.354 | 593-45-3   | 0.05 ± 0.005 a         | 0.03 ± 0.002 a        | -                        | -                      | -                      |
| acetic acid             | 34.724 | 103-45-7   | 0.02 ± 0.004 a         | -                     | -                        | 0.03 ± 0.003 a         | 0.07 ± 0.01 a          |
| <b>TOTAL</b>            |        |            | <b>0.19 ± 0.012 a</b>  | <b>0.03 ± 0.002 a</b> | <b>0.14 ± 0.02 a</b>     | <b>0.40 ± 0.043 b</b>  | <b>0.07 ± 0.018 a</b>  |
| <b>TOTAL</b>            |        |            | <b>36.84 ± 3.745 a</b> | <b>43.12 ± 6.59 a</b> | <b>168.24 ± 26.495 b</b> | <b>23.10 ± 2.408 a</b> | <b>30.26 ± 5.438 a</b> |

**Table S4.** The content and composition of VOCs ( $\mu\text{g}$  IS equivalents/g sample) in *R. damascena*. Results are expressed as compound concentration per 3-nonanone standard.

|                                 | Rt     | Cas ID     | <i>R. damascena</i> |
|---------------------------------|--------|------------|---------------------|
| <b>MONOTERPENS</b>              |        |            |                     |
| $\alpha$ -Pinene                | 6.982  | 80-56-8    | 9.01 ± 1.50         |
| $\beta$ -Pinene                 | 9.673  | 18172-67-3 | 1.39 ± 0.23         |
| Sabinene                        | 10.202 | 3387-41-5  | 0.61 ± 0.08         |
| $\beta$ -Myrcene                | 12.117 | 123-35-3   | 4.96 ± 0.66         |
| $\alpha$ -Terpinene             | 12.756 | 99-86-5    | 0.14 ± 0.01         |
| <i>D</i> -Limonene              | 13.715 | 5989-27-5  | 0.88 ± 0.09         |
| <i>trans</i> - $\beta$ -Ocimene | 15.365 | 3779-61-1  | 0.18 ± 0.01         |
| $\gamma$ -Terpinene             | 15.823 | 99-85-4    | 0.42 ± 0.05         |
| <i>p</i> -Cymene                | 16.982 | 99-87-6    | 0.48 ± 0.08         |
| <b>TOTAL</b>                    |        |            | <b>18.07 ± 2.71</b> |
| <b>SESQUITERPENES</b>           |        |            |                     |
| $\alpha$ -Gurjunene             | 30.824 | 489-40-7   | 0.18 ± 0.02         |
| $\alpha$ -Humulene              | 32.959 | 6753-98-6  | 0.07 ± 0.03         |
| $\gamma$ -Muurolene             | 33.272 | 30021-74-0 | 0.08 ± 0.04         |
| <i>D</i> -Germacrene            | 33.560 | 23986-74-5 | 0.13 ± 0.04         |
| $\alpha$ -Guaïen                | 33.640 |            | 0.09 ± 0.02         |
| Naphthalene                     | 33.746 | 483-75-0   | 0.08 ± 0.01         |
| $\delta$ -Cadinene              | 34.130 | 16729-01-4 | 0.03 ± 0.0          |
| <b>TOTAL</b>                    |        |            | <b>0.66 ± 0.16</b>  |
| <b>ALDEHYDES</b>                |        |            |                     |
| Hexanal                         | 9.114  | 66-25-1    | 4.45 ± 1.17         |
| 3-Hexenal                       | 11.349 | 4440-65-7  | 0.06 ± 0.01         |

|                            |        |            |                      |
|----------------------------|--------|------------|----------------------|
| 2-Hexenal                  | 14.823 | 505-57-7   | 11.60 ± 1.89         |
| <i>E,E</i> -2,4-Hexadienal | 23.045 | 142-83-6   | 0.29 ± 0.08          |
| Benzaldehyde               | 28.186 | 100-52-7   | 0.13 ± 0.01          |
| $\alpha$ -Citral           | 33.851 | 5392-40-5  | 0.11 ± 0.004         |
| <b>TOTAL</b>               |        |            | <b>16.64 ± 3.164</b> |
| <b>ALCOHOLS</b>            |        |            |                      |
| 1-Penten-3-ol              | 12.613 | 616-25-1   | 0.13 ± 0.02          |
| (-)-Isopinocampheol        | 14.086 |            | 0.52 ± 0.06          |
| 1-Butanol                  | 14.614 | 137-32-6   | 0.07 ± 0.01          |
| <i>Z</i> -2-Penten-1-ol    | 19.651 | 1576-95-0  | 0.04 ± 0.01          |
| <i>Z</i> -3-Hexen-1-ol     | 22.464 | 928-96-1   | 0.05 ± 0.001         |
| <i>E</i> -2-Hexen-1-ol     | 23.427 | 928-95-0   | 0.19 ± 0.10          |
| Linalool                   | 29.300 | 78-70-6    | 0.07 ± 0.01          |
| Perilla alcohol tiglate    | 31.111 | 97575-00-3 | 0.16 ± 0.08          |
| Lavanduol                  | 34.082 | 141-12-8   | 0.09 ± 0.05          |
| Citronellol                | 34.199 | 106-22-9   | 1.53 ± 0.26          |
| Nerol                      | 34.544 | 106-25-2   | 0.24 ± 0.04          |
| Geraniol                   | 34.922 | 106-25-2   | 0.48 ± 0.04          |
| Benzyl alcohol             | 35.229 | 100-51-6   | 0.11 ± 0.01          |
| Phenylethyl alcohol        | 35.537 | 60-12-8    | 3.08 ± 0.55          |
| <b>TOTAL</b>               |        |            | <b>6.76 ± 1.231</b>  |
| <b>KETONES</b>             |        |            |                      |
| 3-Octanone                 | 29.064 | 6137-15-1  | 0.04 ± 0.01          |
| 1,4-Cyclohex-2-enedione    | 33.932 | 4505-38-8  | 0.15 ± 0.02          |
| <b>TOTAL</b>               |        |            | <b>0.19 ± 0.03</b>   |
| <b>HYDROCARBONS</b>        |        |            |                      |
| 1,3,6-Octatriene           | 16.125 | 3338-55-4  | 0.33 ± 0.01          |
| Cyclohexene                | 17.538 | 586-63-0   | 0.24 ± 0.02          |
| <i>n</i> -Pentadecane      | 26.692 | 629-62-9   | 0.09 ± 0.01          |
| Caryophyllene              | 31.098 | 87-44-5    | 0.19 ± 0.07          |
| <i>n</i> -Heptadecane      | 33.207 | 629-78-7   | 0.22 ± 0.12          |
| Nonadecane                 | 34.355 | 629-94-7   | 0.02 ± 0.002         |
| <i>n</i> -Nonadecane       | 34.925 | 106-24-1   | 0.55 ± 0.03          |
| Henicos-1-ene              | 35.332 | 1599-68-4  | 0.26 ± 0.01          |
| <i>n</i> -Eicosane         | 35.949 | 112-95-8   | 0.04 ± 0.01          |
| Heneicosane                | 36.781 | 629-94-7   | 0.15 ± 0.02          |
| <b>TOTAL</b>               |        |            | <b>2.09 ± 0.302</b>  |
| <b>PHENYLPROPENES</b>      |        |            |                      |
| Methyl eugenol             | 36.294 | 93-15-2    | 0.06 ± 0.01          |
| <b>OTHER COMPOUNDS</b>     |        |            |                      |
| Acetic acid                | 34.727 | 150-84-5   | 0.08 ± 0.002         |
| <b>TOTAL</b>               |        |            | <b>44.55 ± 7.609</b> |
